# Supplementary material
Source: PubMed Central journal article supplement (PMC3691534)
Supplement: peds.2012-3877_peds.2012-3877SupplementaryData.pdf [file peds.2012-3877_peds.2012-3877SupplementaryData.pdf]

## Supplemental Information

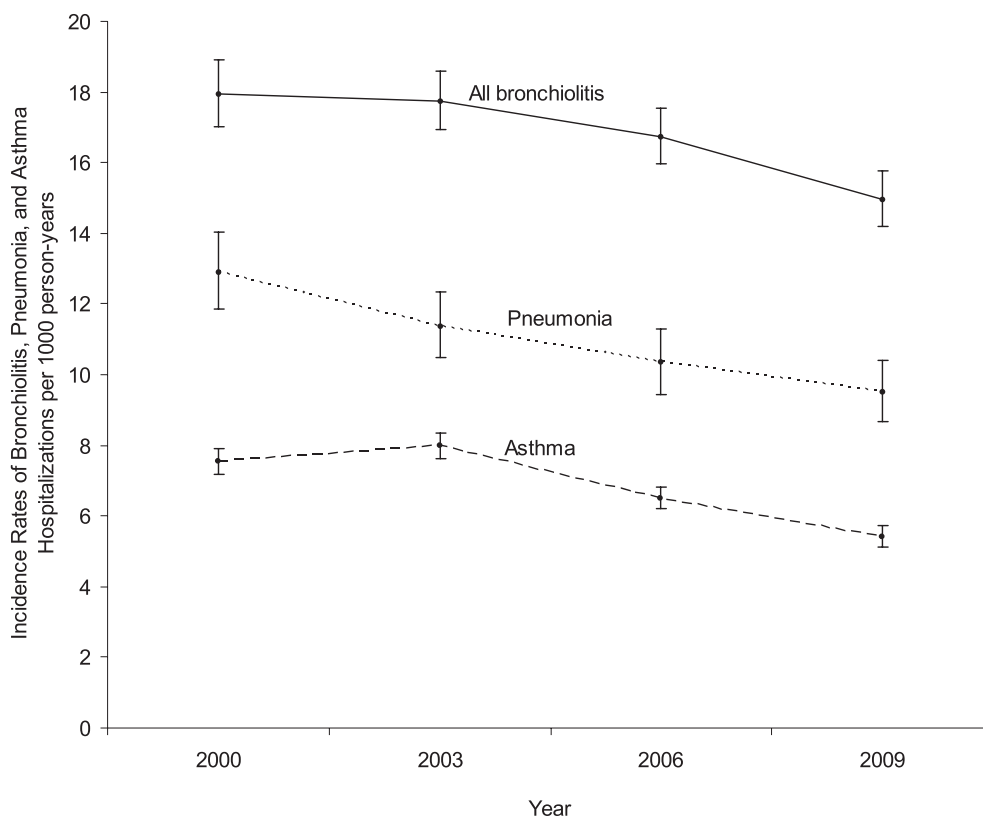

### SUPPLEMENTAL FIGURE 3

Incidence rates of US bronchiolitis, pneumonia, and asthma hospitalizations per 1000 children, age <2 years; 2000–2009. We identified children aged <2 years with pneumonia by using CCS code 122 and those with asthma by using CCS code 128 in the primary or secondary diagnosis fields. For all disease groups, a decreasing trend in incidence of hospitalization was seen across all study years ( $P_{\text{trend}} < .001$ ). I bars represent 95% CIs.

**SUPPLEMENTAL TABLE 4** Use of Mechanical Ventilation in US Bronchiolitis Hospitalizations, According to Various Definitions, 2000–2009

|                                                                         | Weighted Sample, <i>n</i> | Use of Mechanical Ventilation, % (95% CI) |               |               |               | <i>P</i> for Trend |
|-------------------------------------------------------------------------|---------------------------|-------------------------------------------|---------------|---------------|---------------|--------------------|
|                                                                         |                           | 2000                                      | 2003          | 2006          | 2009          |                    |
| All bronchiolitis                                                       | 544 828                   | 1.9 (1.6–2.2)                             | 2.0 (1.7–2.2) | 2.1 (1.8–2.4) | 2.3 (2.1–2.6) | .008               |
| Sensitivity analyses                                                    |                           |                                           |               |               |               |                    |
| Bronchiolitis as primary diagnosis                                      | 485 656                   | 1.8 (1.5–2.1)                             | 1.8 (1.6–2.0) | 1.9 (1.7–2.2) | 2.1 (1.8–2.3) | .04                |
| Age 0–11 mo                                                             | 461 506                   | 2.1 (1.8–2.4)                             | 2.1 (1.9–2.4) | 2.3 (2.1–2.6) | 2.6 (2.3–2.8) | .003               |
| Age 12–23 mo                                                            | 83 322                    | 0.7 (0.5–1.0)                             | 0.9 (0.7–1.1) | 0.8 (0.6–1.0) | 1.0 (0.8–1.3) | .09                |
| No high-risk condition <sup>a</sup>                                     | 509 127                   | 2.9 (2.7–3.1)                             | 3.1 (2.9–3.2) | 3.3 (3.1–3.4) | 3.3 (3.2–3.5) | .69                |
| Bronchiolitis as primary diagnosis, age 0–11 mo, no high-risk condition | 388 559                   | 1.5 (1.4–1.7)                             | 1.5 (1.3–1.7) | 1.6 (1.4–1.8) | 1.6 (1.4–1.8) | .32                |

<sup>a</sup>High-risk medical condition was defined as history of prematurity or at least 1 complex medical condition, previously defined by using ICD-9-CM codes in 9 categories of illness (ie, neuromuscular, cardiovascular, respiratory, renal, gastrointestinal, hematology or immunologic, metabolic, malignancy, and other congenital or genetic defect disorders).

**SUPPLEMENTAL TABLE 5** Unadjusted and Multivariable Models of Use of Mechanical Ventilation in US Bronchiolitis Hospitalizations, 2000–2009

| Variable                             | Use of Mechanical Ventilation |                               |
|--------------------------------------|-------------------------------|-------------------------------|
|                                      | Unadjusted Model              | Multivariable Model           |
| Calendar year                        |                               |                               |
| 2000                                 | Reference                     | Reference                     |
| 2003                                 | 1.02 (0.89–1.08)              | 0.98 (0.85–1.13)              |
| 2006                                 | 1.10 (0.95–1.27)              | 0.97 (0.83–1.13)              |
| 2009                                 | 1.21 (1.04–1.41) <sup>a</sup> | 0.98 (0.84–1.15)              |
| Age, mo                              |                               |                               |
| 0–11                                 | —                             | 2.62 (2.31–2.96) <sup>a</sup> |
| 12–23                                | —                             | Reference                     |
| Male gender (versus female)          | —                             | 1.01 (0.96–1.07)              |
| Race or ethnic group                 |                               |                               |
| White                                | —                             | 1.37 (1.20–1.57) <sup>a</sup> |
| Black                                | —                             | Reference                     |
| Hispanic                             | —                             | 1.04 (0.87–1.26)              |
| Other                                | —                             | 1.54 (1.29–1.83) <sup>a</sup> |
| Type of health insurance             |                               |                               |
| Public                               | —                             | 1.26 (1.15–1.37) <sup>a</sup> |
| Private                              | —                             | Reference                     |
| Other                                | —                             | 1.24 (1.03–1.49) <sup>a</sup> |
| Admission day                        |                               |                               |
| Weekday                              | —                             | Reference                     |
| Weekend                              | —                             | 1.10 (1.02–1.18) <sup>a</sup> |
| Any high-risk condition <sup>b</sup> | —                             | 4.37 (3.99–4.79) <sup>a</sup> |
| Region                               |                               |                               |
| Northeast                            | —                             | Reference                     |
| Midwest                              | —                             | 0.76 (0.56–1.02)              |
| South                                | —                             | 0.82 (0.62–1.10)              |
| West                                 | —                             | 0.85 (0.65–1.11)              |
| Location/teaching status             |                               |                               |
| Rural                                | —                             | Reference                     |
| Urban nonteaching                    | —                             | 2.33 (1.58–3.44) <sup>a</sup> |
| Urban teaching                       | —                             | 5.74 (3.83–8.60) <sup>a</sup> |
| Hospital designation                 |                               |                               |
| Children's hospital                  | —                             | 2.57 (2.06–3.20) <sup>a</sup> |
| Non-children's hospital              | —                             | Reference                     |

Data are expressed as OR (95% CI).

<sup>a</sup>Statistically significant.

<sup>b</sup>High-risk medical condition was defined as  $\geq 1$  complex medical condition, previously defined by using ICD-9-CM codes in 9 categories of illness (ie, neuromuscular, cardiovascular, respiratory, renal, gastrointestinal, hematology or immunologic, metabolic, malignancy, and other congenital or genetic defect disorders).

**SUPPLEMENTAL TABLE 6** Hospital Charges per Case of Bronchiolitis, According to Various Definitions, 2000–2009

|                                                                            | Weighted Sample, <i>n</i> | Hospital Charges, 2009 US Dollars |                    |                    |                    | <i>P</i> for Trend |
|----------------------------------------------------------------------------|---------------------------|-----------------------------------|--------------------|--------------------|--------------------|--------------------|
|                                                                            |                           | 2000                              | 2003               | 2006               | 2009               |                    |
| All bronchiolitis                                                          | 544 828                   |                                   |                    |                    |                    |                    |
| Geometric mean (95% CI)                                                    |                           | 6384 (6137–6632)                  | 7102 (6835–7369)   | 7729 (7424–8035)   | 8534 (8180–8888)   | <.001              |
| Median (IQR)                                                               |                           | 5659 (3704–10 199)                | 6637 (4033–11 390) | 7284 (4417–12 597) | 8062 (4842–13 971) |                    |
| Sensitivity analyses                                                       |                           |                                   |                    |                    |                    |                    |
| Bronchiolitis as primary diagnosis                                         | 485 656                   |                                   |                    |                    |                    |                    |
| Geometric mean (95% CI)                                                    |                           | 6291 (6047–6535)                  | 7004 (6746–7261)   | 7580 (7282–7879)   | 8332 (7982–8683)   | <.001              |
| Median (IQR)                                                               |                           | 5900 (3666–10 063)                | 6565 (3998–11 226) | 7168 (4347–12 325) | 7894 (4745–13 624) |                    |
| Age 0–11 mo                                                                | 461 506                   |                                   |                    |                    |                    |                    |
| Geometric mean (95% CI)                                                    |                           | 6512 (6257–6767)                  | 7224 (6963–7525)   | 7919 (7599–8240)   | 8766 (8399–9133)   | <.001              |
| Median (IQR)                                                               |                           | 6107 (3753–10 434)                | 6776 (4102–11 676) | 7464 (4509–12 933) | 8267 (4949–14 462) |                    |
| No high-risk condition <sup>a</sup>                                        | 509 127                   |                                   |                    |                    |                    |                    |
| Geometric mean (95% CI)                                                    |                           | 6148 (5913–6383)                  | 6816 (6571–7061)   | 7392 (7108–7675)   | 8099 (7774–8424)   | <.001              |
| Median (IQR)                                                               |                           | 5822 (3648–9781)                  | 6446 (3958–10 883) | 7059 (4324–11 998) | 7779 (4723–13 191) |                    |
| Bronchiolitis as primary diagnosis, age 0–11 mo and no high risk condition | 388 559                   |                                   |                    |                    |                    |                    |
| Geometric mean (95% CI)                                                    |                           | 6176 (5936–6416)                  | 6865 (6617–7114)   | 7411 (7121–7701)   | 8101 (7766–8436)   | <.001              |
| Median (IQR)                                                               |                           | 5877 (3652–9873)                  | 6520 (3991–10 985) | 7097 (4336–12 014) | 7819 (4726–13 245) |                    |

IQR, interquartile range.

<sup>a</sup>High-risk medical condition was defined as history of prematurity or  $\geq 1$  complex medical condition, previously defined by using ICD-9-CM codes in 9 categories of illness (ie, neuromuscular, cardiovascular, respiratory, renal, gastrointestinal, hematology or immunologic, metabolic, malignancy, and other congenital or genetic defect disorders).
